# Supplementary material for: On the vacancy-controlled dealloying of rapidly solidified Mg–Ag alloys
Source: Royal Society of Chemistry journal article supplement (doi:10.1039/c1ce05257h), 2011-01-01
Supplement: c1ce05257h.pdf [file c1ce05257h.pdf]

## Electronic Supporting Information for:

# On the vacancy-controlled dealloying of rapidly solidified Mg-Ag alloys

Hong Ji, Chi Zhang, Junling Xu, Changchun Zhao, Xiaoguang Wang, Zhonghua Zhang\*

Key Laboratory for Liquid-Solid Structural Evolution and Processing of Materials (Ministry of Education), School of Materials Science and Engineering, Shandong University, Jingshi Road 17923, Jinan 250061, PR China

\* Corresponding author. Email: zh\_zhang@sdu.edu.cn

## Experimental procedure:

Mg-Ag alloys with nominal compositions of  $\text{Mg}_{65}\text{Ag}_{35}$ ,  $\text{Mg}_{62}\text{Ag}_{38}$ ,  $\text{Mg}_{58}\text{Ag}_{42}$ ,  $\text{Mg}_{54}\text{Ag}_{46}$ , and  $\text{Mg}_{50}\text{Ag}_{50}$  (at.%) were prepared from pure Mg (99.9 wt.%) and pure Ag (99.9 wt.%) in a quartz crucible using a high-frequency induction furnace in an argon atmosphere. Using a single roller melt spinning apparatus, the prealloyed ingots were remelted in a quartz tube by high-frequency induction heating and then rapidly solidified onto a copper roller at a circumferential speed of  $\sim 18 \text{ m s}^{-1}$ .

The dealloying of the  $\text{Mg}_{65}\text{Ag}_{35}$  and  $\text{Mg}_{62}\text{Ag}_{38}$  ribbons was firstly performed in the 1 wt. % HCl solution at room temperature. Then the dealloying was continuously carried out in the same solution at  $90 \pm 5 \text{ }^\circ\text{C}$  in order to further leach out the residual Mg in the samples. In comparison, no bubbles emerged when the  $\text{Mg}_{58}\text{Ag}_{42}$  and  $\text{Mg}_{54}\text{Ag}_{46}$  ribbons were immersed in the 1 wt. % HCl solution at room temperature. Thus the dealloying of the  $\text{Mg}_{58}\text{Ag}_{42}$  and  $\text{Mg}_{54}\text{Ag}_{46}$  alloy was directly carried out at  $90 \pm 5 \text{ }^\circ\text{C}$ . It is astonishing that the  $\text{Mg}_{50}\text{Ag}_{50}$  alloy cannot be dealloyed even in the 10 wt.% HCl solution at  $90 \pm 5 \text{ }^\circ\text{C}$ .

Microstructural characterization of the rapidly solidified Mg-Ag alloys and as-dealloyed samples was performed using X-ray diffraction (XRD, Hitachi Rigaku D/max-RB) with  $\text{Cu K}\alpha$  radiation, scanning electron microscopy (SEM, LEO 1530VP), and X-ray photoelectron spectroscopy (XPS, ESCALAB 250) using monochromatic  $\text{Al K}\alpha$  radiation.

## Electrochemical measurements:

Electrochemical measurements were performed in a standard three-electrode cell using an LK 2500A Potentiostat. A 1 M NaCl aqueous solution was chosen as electrolyte to avoid the interference of chemical dealloying. The Mg-Ag ribbons were directly used as the working electrode. The counter electrode was a Pt plate, while the reference electrode was a saturated calomel electrode (SCE). Prior to electrochemical measurements, the electrolytes were deaerated by bubbling with  $\text{N}_2$  for 10 min.

## Figures and Tables:

**Table E1** Lattice parameter (nm) of different Mg-Ag alloys calculated using the Bragg Equation with different crystal planes.

| alloy composition                 | crystal plane |        |        |        |        |        | average |
|-----------------------------------|---------------|--------|--------|--------|--------|--------|---------|
|                                   | (100)         | (110)  | (111)  | (200)  | (210)  | (211)  |         |
| Mg <sub>65</sub> Ag <sub>35</sub> | 0.3341        | 0.3344 | 0.3345 | 0.3344 | 0.3341 | 0.3343 | 0.3343  |
| Mg <sub>62</sub> Ag <sub>38</sub> | 0.3339        | 0.3338 | 0.3338 | 0.3340 | 0.3340 | 0.3339 | 0.3339  |
| Mg <sub>58</sub> Ag <sub>42</sub> | 0.3321        | 0.3316 | 0.3323 | 0.3324 | 0.3324 | 0.3324 | 0.3322  |
| Mg <sub>54</sub> Ag <sub>46</sub> | 0.3311        | 0.3314 | 0.3310 | 0.3313 | 0.3311 | 0.3312 | 0.3312  |
| Mg <sub>50</sub> Ag <sub>50</sub> | 0.3302        | 0.3302 | 0.3303 | 0.3305 | 0.3305 | 0.3306 | 0.3304  |

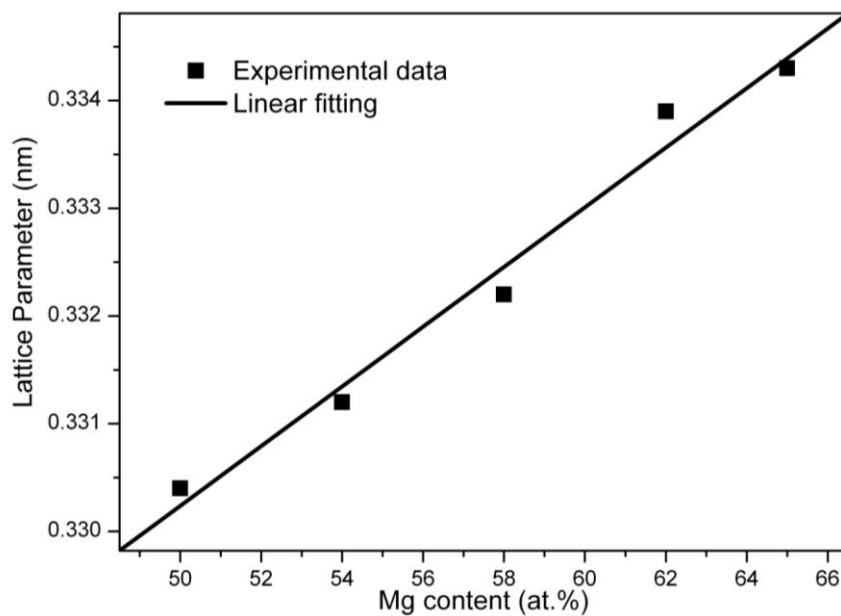

**Fig. E1** Plot of lattice parameter vs. Mg content in the rapidly solidified Mg-Ag alloys.

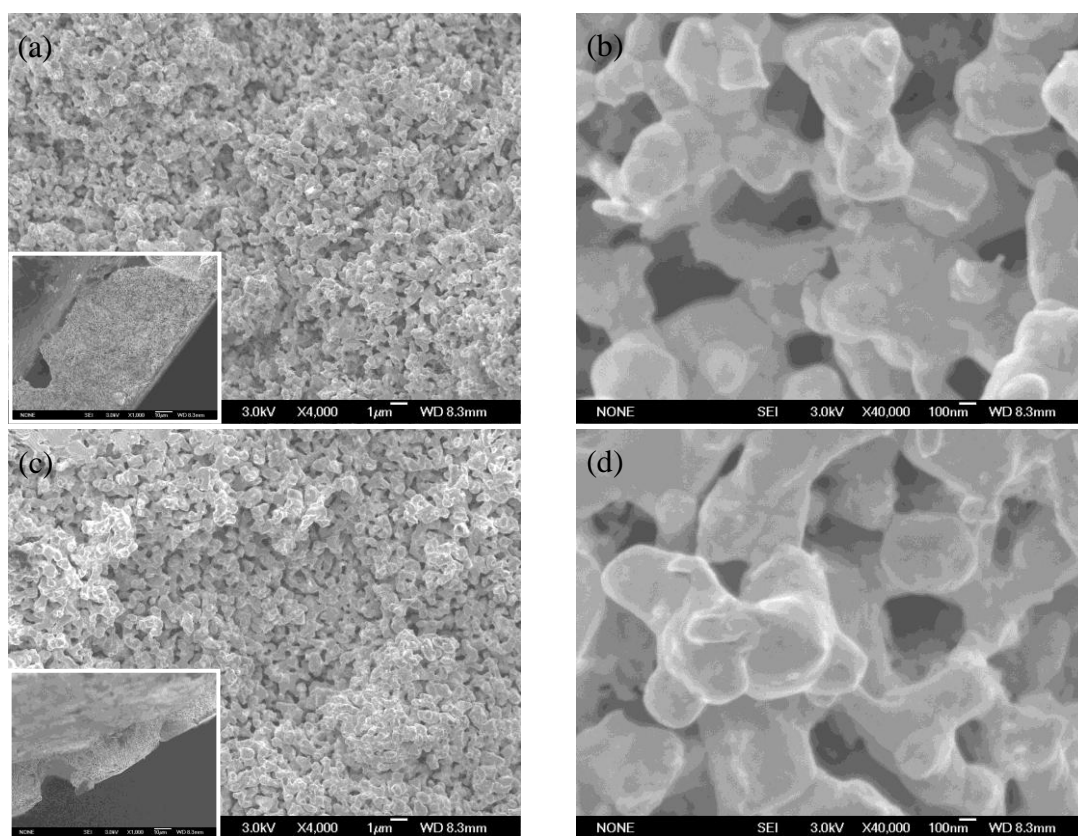

**Fig. E2** The SEM micrographs showing the section-view microstructure of the np-Ag by dealloying (a, b)  $Mg_{62}Ag_{38}$  and (c, d)  $Mg_{54}Ag_{46}$  alloys in the 1 wt.% HCl solution.

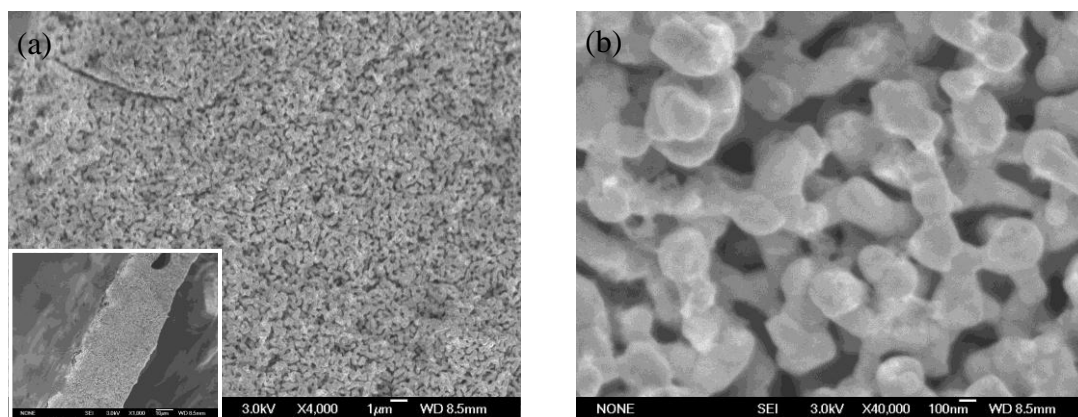

**Fig. E3** The SEM micrographs showing the section-view microstructure of the np-Ag by dealloying the  $Mg_{65}Ag_{35}$  alloy in the 1 wt.% HCl solution for 600 min.

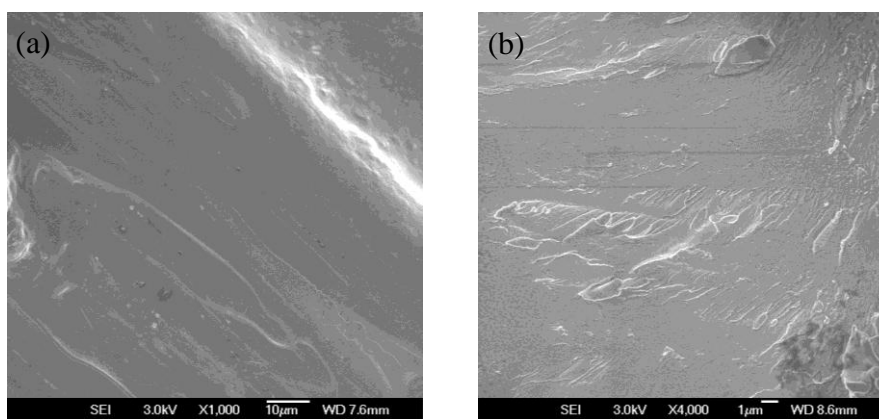

**Fig. E4** The SEM micrographs showing the (a) surface-view and (b) section-view microstructure of the rapidly solidified Mg<sub>65</sub>Ag<sub>35</sub> alloy.

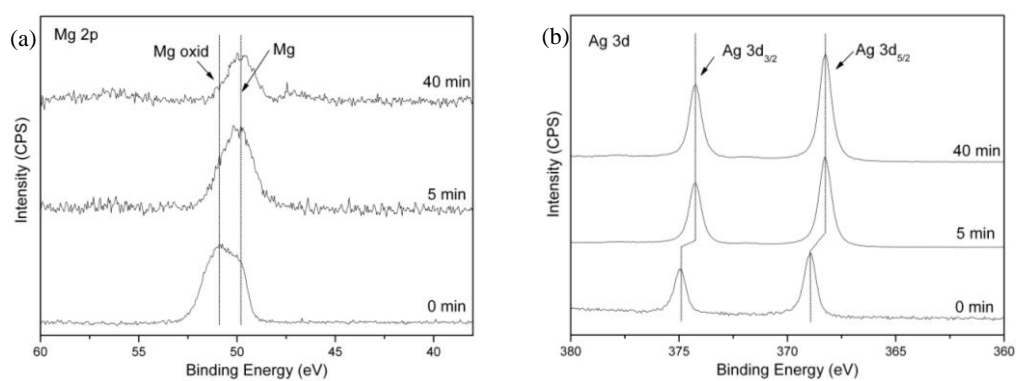

**Fig. E5** (a) Mg 2p and (b) Ag 3d XPS spectra of the  $Mg_{65}Ag_{35}$  alloy deallayed in the 1 wt.% HCl solution for 0, 5, and 40 min.

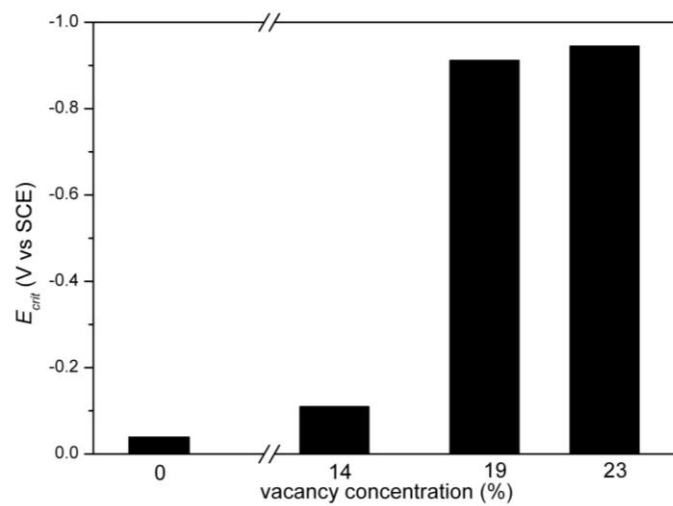

**Fig. E6** The histogram of  $E_{crit}$  vs. vacancy concentration for the rapidly solidified Mg-Ag alloys.
